# Supplementary material
Source: MDPI journal article supplement (https://www.mdpi.com/2075-4655/6/4/35)
Supplement: s1 [file s1]

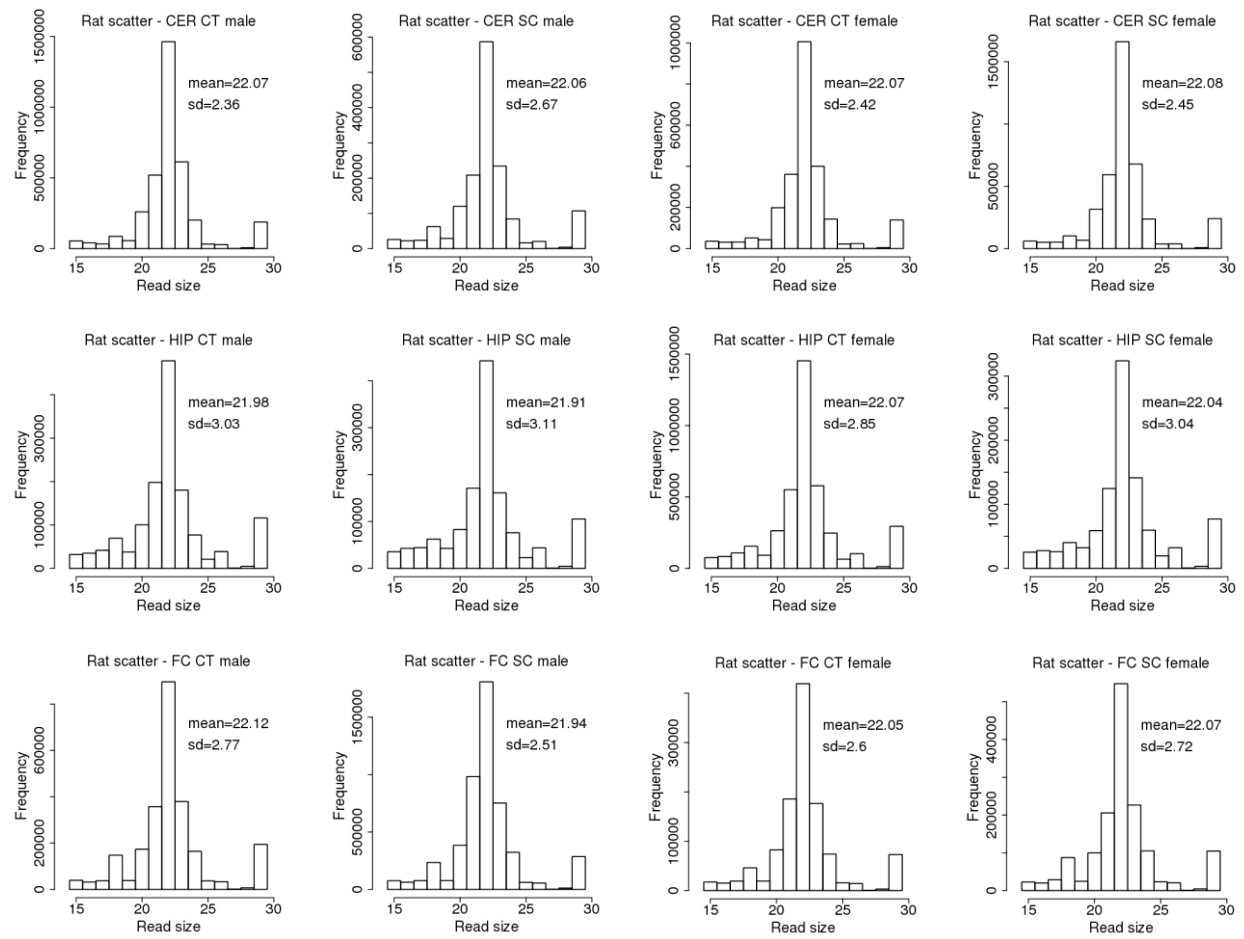

**Figure S1.** ncRNA read size distribution. Y axis shows the number of the reads, while X-axis shows the size of the ncRNA reads in various regions of the brain in male and female rats.



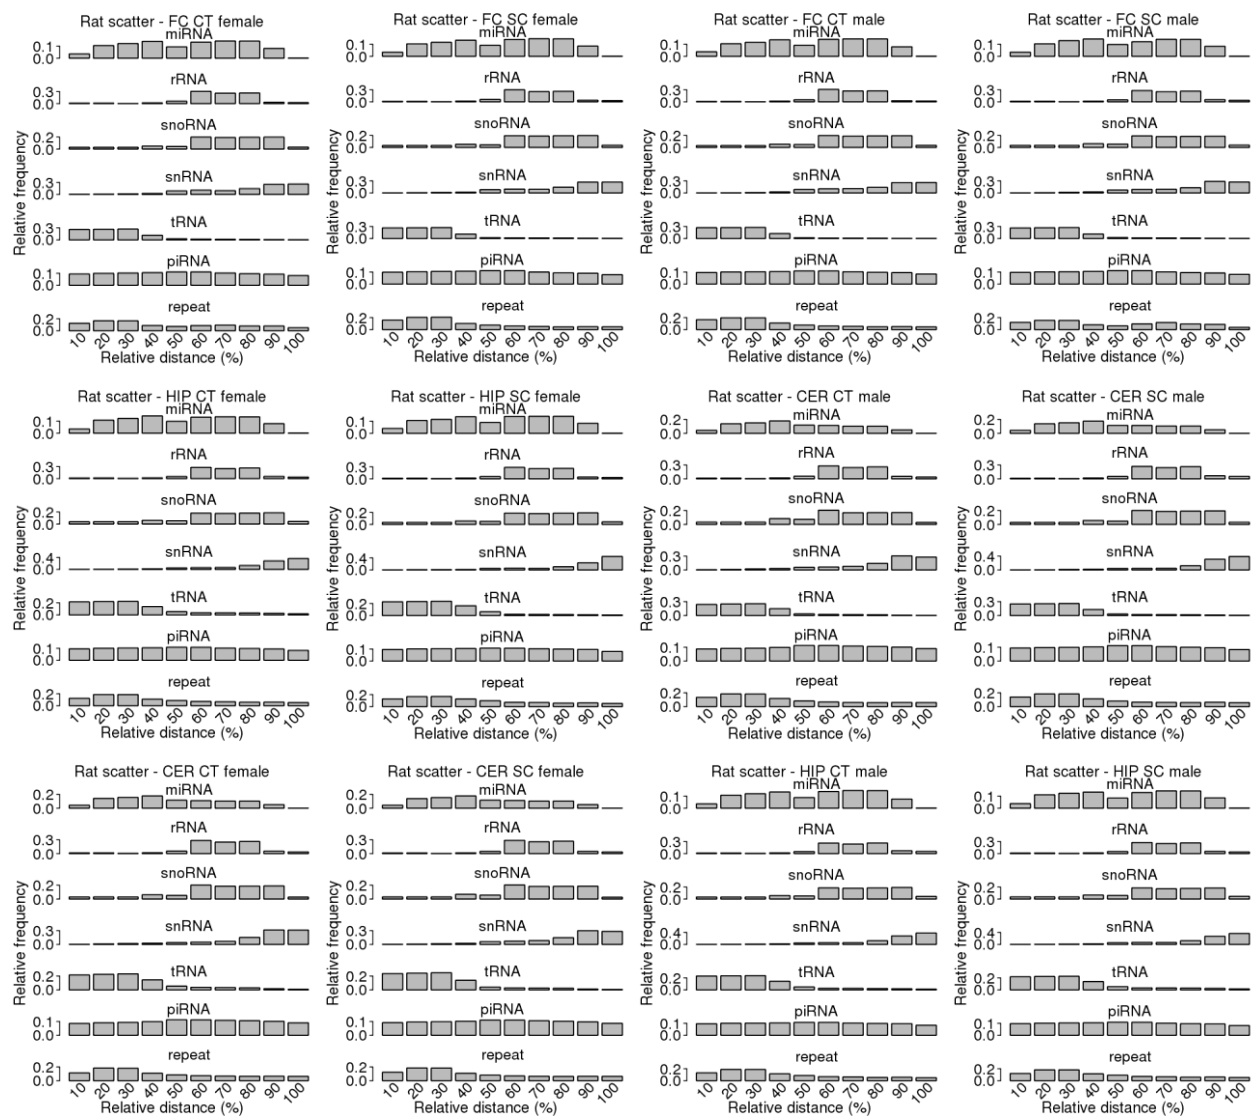

**Figure S3. Analysis of reads distribution across the whole length of ncRNAs.** The entire length of each ncRNA was taken as 100% and then divided into bins of 10% each, with 0 to 10% representing the first 10% of the ncRNA's length starting from the 5' end. The data are shown as the relative frequency of reads (calculated from three biological replicates) in a specific bin calculated by dividing the frequency of reads in a specific bin by all reads mapping to the entire length of ncRNA.

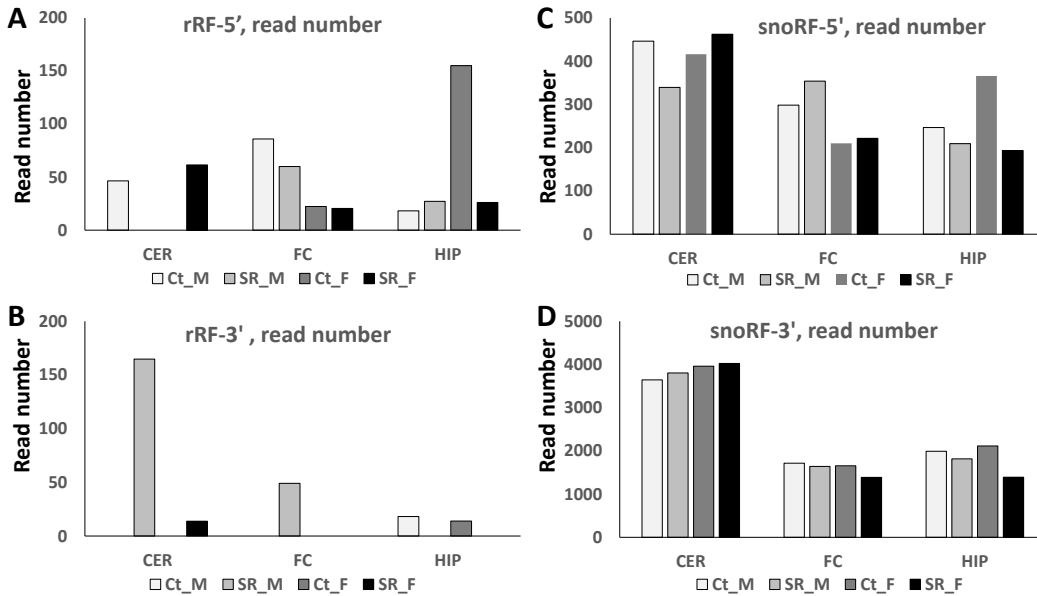

**Figure S4. Number of rRF and snoRF reads mapping to the 5' or 3' ends of rRNA or snoRNAs.** A. Number of rRF-5' reads in various brain regions of male and female rats. B. Number of rRF-3' reads in various brain regions of male and female rats. C. Number of snoRF-5' reads in various brain regions of male and female rats. D. Number of snoRF-3' reads in various brain regions of male and female rats.

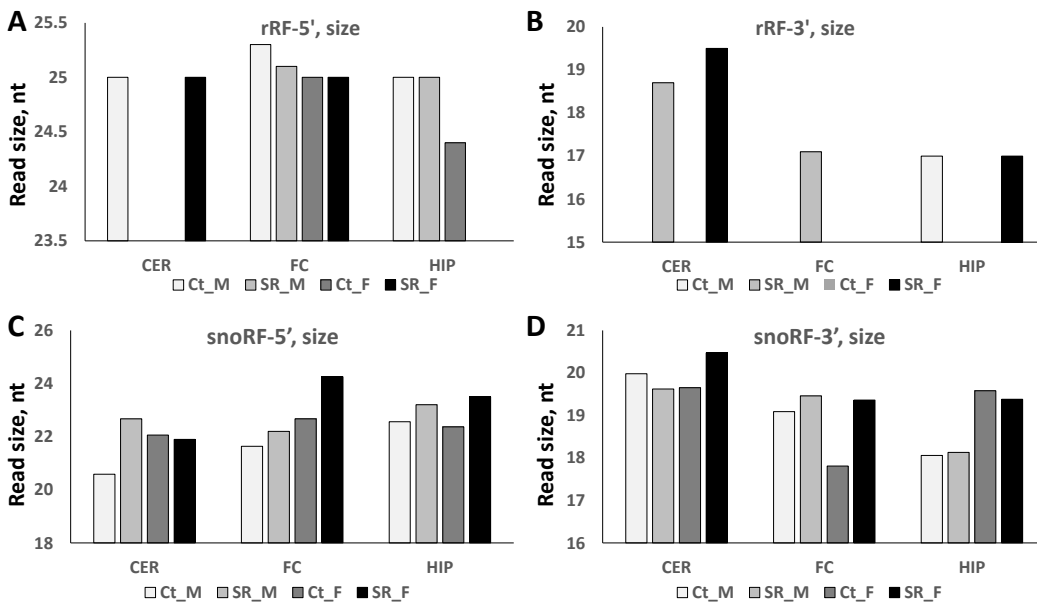

**Figure S5. Size of rRF and snoRF reads mapping to the 5' or 3' ends of rRNA or snoRNAs.** A. Size of rRF-5' reads in various brain regions of male and female rats. B. Size of rRF-3' reads in various brain regions of male and female rats. C. Size of snoRF-5' reads in various brain regions of male and female rats. D. Size of snoRF-3' reads in various brain regions of male and female rats.
